# Supplementary material for: Spatiotemporal responses of runoff to climate change on the southern Tibetan Plateau
Source: Copernicus journal article supplement (doi:10.5194/hess-2024-11), 2024-01-23
Supplement: Supplementary file [file hess-2024-11-CC3-supplement.pdf]

- 1) As per the authors, the temporal resolution of the modeling work was 3 h (line 270-271). Moreover, as per the authors, the temporal resolution of the precipitation dataset was 24 h (line 165-166). The conversion algorithm from 24 h to 3 h is not found in the current version of the manuscript. How was this conversion carried out in the integrated modeling environment? The computation of  $R_{glac}$  (eq.2 and eq.3) contradicts line 270-271.
- 2) As per eq.1 (line 278-282),  $R_{vic}$  is the runoff (surface+baseflow) computed by a model named Variable Infiltration Capacity (VIC). In other words, given the rainfall and the other defining parameters, the model generates the runoff for each pixel/grid (spatial resolution of 10km, see the attached pdf file). As per eq.1, the authors consider only the portion of the runoff (i.e.,  $(1-f)R_{vic}$ ) generated in a grid/pixel for the rainfall value given for that pixel/grid. What has happened to the other component (i.e.,  $f \cdot R_{vic}$ )? As per eq.2, the parameter DDF (i.e., the degree-day factor of glacier or snow melt, see line 284-285) doesn't account for this component (i.e.,  $f \cdot R_{vic}$ ).

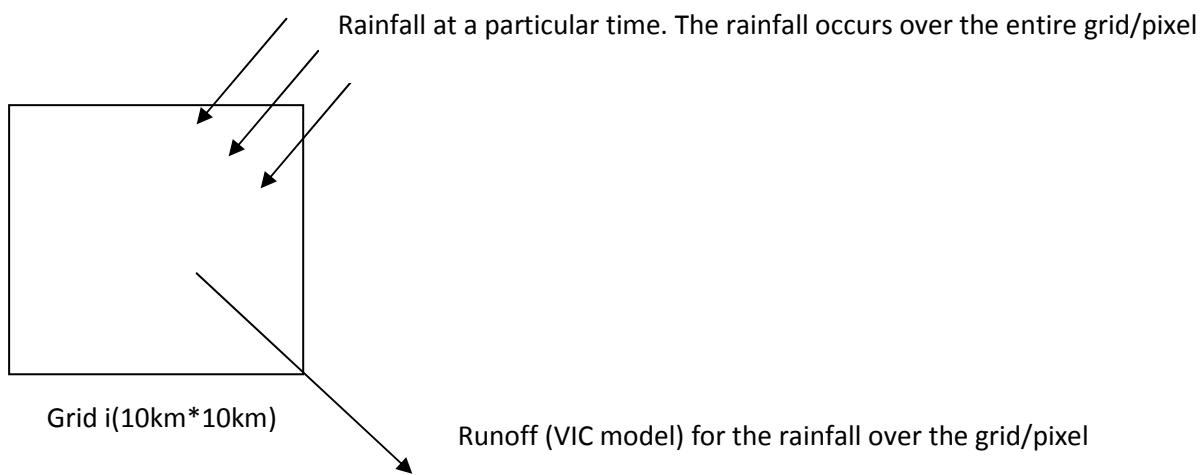

Assume that this particular grid/pixel has a glacier as per the figure below. What will be the runoff from this grid/pixel?

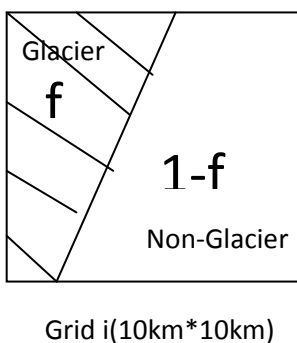

Didn't the rainfall occur over the shaded area? Didn't VIC produce runoff over the shaded area?

- 3) Refer to Part IV

## Acknowledgement and Disclaimer

The author is an alumnus of Texas A&M University, Texas, USA. The views expressed here are solely those of the author in his private capacity and do not in any way represent the views of Texas A&M University, Texas, USA.
